# Supplementary material
Source: PubMed Central journal article supplement (PMC6170007)
Supplement: NIHMS928257-supplement-2.pdf [file NIHMS928257-supplement-2.pdf]

## Supplementary Tables for “Sub-ångstrom cryo-EM structure of a prion protofibril reveals a polar clasp”

**Supplementary Table 1.** Crystallographic structure determination of proto-PrP<sup>Sc</sup>.

| proto-PrP <sup>Sc</sup>          | X-ray                      | MicroED<br>(Phenix)                 | MicroED<br>(Refmac) |
|----------------------------------|----------------------------|-------------------------------------|---------------------|
| <b>Data collection</b>           |                            |                                     |                     |
| Space group                      | P1                         | P1                                  |                     |
| Cell dimensions                  |                            |                                     |                     |
| <i>a, b, c</i> (Å)               | 4.87 10.11 30.42           | 4.94 10.34 31.15                    |                     |
| <i>α, β, γ</i> (°)               | 93.36 91.15 101.66         | 94.26 92.38 102.20                  |                     |
| Resolution (Å)                   | 30.35 - 1.10 (1.14 - 1.10) | 10.34-0.75 (0.78-0.75) <sup>a</sup> |                     |
| <i>R</i> <sub>merge</sub>        | 0.099 (0.405)              | 0.232 (0.638)                       |                     |
| <i>R</i> <sub>meas</sub>         | 0.142 (0.573)              | 0.250 (0.729)                       |                     |
| <i>R</i> <sub>pim</sub>          | 0.098 (0.405)              | 0.090 (0.319)                       |                     |
| <i>I</i> / <i>σ</i> ( <i>I</i> ) | 6.20 (1.92)                | 4.57 (1.77)                         |                     |
| <i>CC</i> <sub>1/2</sub>         | 0.986 (0.546)              | 0.982 (0.209)                       |                     |
| Completeness (%)                 | 80.75 (46.22)              | 96.95 (96.17)                       |                     |
| No. Reflections                  | 3059 (127)                 | 43252 (2359)                        |                     |
| Redundancy                       | 1.6 (1.2)                  | 5.8 (4.4)                           |                     |
| <b>Refinement</b>                |                            |                                     |                     |
| No. reflections                  | 1866 (110)                 | 7473 (720)                          | 6800 (470)          |
| <i>R</i> <sub>work</sub>         | 0.139 (0.29)               | 0.242 (0.37)                        | 0.233 (0.36)        |
| <i>R</i> <sub>free</sub>         | 0.162 (0.23)               | 0.246 (0.39)                        | 0.254 (0.35)        |
| No. atoms                        |                            |                                     |                     |
| Total                            | 85                         | 152                                 | 152                 |
| Waters                           | 4                          | 2                                   | 2                   |
| Hydrogens Possible               | 70                         | 69                                  | 69                  |
| Hydrogens Modeled <sup>b</sup>   | 0                          | 51                                  | 61                  |
| <i>B</i> factors                 |                            |                                     |                     |
| Protein                          | 12.27                      | 6.00                                | 5.88                |
| Water                            | 23.09                      | 11.59                               | 11.56               |
| R.m.s. deviations                |                            |                                     |                     |
| Bond lengths (Å)                 | 0.007                      | 0.014                               | 0.034               |
| Bond angles (°)                  | 0.99                       | 1.01                                | 2.21                |

<sup>a</sup> Values in parentheses are for the highest-resolution shell.

<sup>b</sup> Hydrogens modelled include only those for which density is observed in 2Fo-Fc maps at 0.70σ or higher.

**Supplementary Table 2. Hydrogen bonds in proto-PrP<sup>Sc</sup>.**

|    | <b>Donor name<sup>a</sup></b> | <b>Atom type</b> | <b>Acceptor name<sup>a</sup></b> | <b>Atom type</b> | <b>DA dist.</b> | <b>DA pair<sup>b</sup></b> | <b>Gap</b> | <b>CA-CA dist.</b> | <b>DHA angle</b> | <b>H-A dist.</b> | <b>H-A-AA angle</b> | <b>D-A-AA angle</b> |
|----|-------------------------------|------------------|----------------------------------|------------------|-----------------|----------------------------|------------|--------------------|------------------|------------------|---------------------|---------------------|
| 1  | A0168-GLN                     | NE2              | B0168-GLN                        | OE1              | 3.02            | SS                         | -          | 4.90               | 136.7            | 2.21             | 137.7               | 150.8               |
| 2  | A0170-ASN                     | ND2              | A0168-GLN                        | OE1              | 3.11            | SS                         | 2          | 6.48               | 176.4            | 2.11             | 108.9               | 109.4               |
| 3  | A0169-TYR                     | N                | B0168-GLN                        | O                | 3.00            | MM                         | -          | 6.32               | 164.6            | 2.17             | 163.5               | 167.8               |
| 4  | B0170-ASN                     | N                | A0169-TYR                        | O                | 2.85            | MM                         | -          | 6.00               | 163.4            | 2.01             | 166                 | 170.9               |
| 5  | B0170-ASN                     | ND2              | A0170-ASN                        | OD1              | 2.90            | SS                         | -          | 4.90               | 159.5            | 1.94             | 160.1               | 167.0               |
| 6  | A0171-ASN                     | N                | B0170-ASN                        | O                | 3.01            | MM                         | -          | 6.24               | 144.0            | 2.27             | 151.4               | 161.1               |
| 7  | B0172-GLN                     | N                | A0171-ASN                        | O                | 3.19            | MM                         | -          | 6.48               | 142.2            | 2.46             | 139.6               | 149.0               |
| 8  | A0171-ASN                     | ND2              | B0171-ASN                        | OD1              | 2.87            | SS                         | -          | 4.90               | 151.1            | 1.95             | 153.7               | 163.4               |
| 9  | A0173-ASN                     | ND2              | A0171-ASN                        | OD1              | 3.09            | SS                         | 2          | 6.93               | 146.1            | 2.21             | 106.4               | 99.4                |
| 10 | A0172-GLN                     | NE2              | A0174-ASN                        | OD1              | 2.99            | SS                         | 2          | 7.07               | 173.3            | 2.00             | 108.7               | 110.9               |
| 11 | A0172-GLN                     | NE2              | B0172-GLN                        | OE1              | 2.92            | SS                         | -          | 4.90               | 164.1            | 1.95             | 162.3               | 167.7               |
| 12 | C0171-ASN                     | ND2              | A0172-GLN                        | OE1              | 3.04            | SS                         | -          | 8.49               | 131.4            | 2.28             | 113.5               | 102.0               |
| 13 | B0174-ASN                     | N                | A0173-ASN                        | O                | 3.06            | MM                         | -          | 6.48               | 160.0            | 2.24             | 159.1               | 164.6               |
| 14 | A0173-ASN                     | ND2              | B0173-ASN                        | OD1              | 3.07            | SS                         | -          | 4.90               | 156.0            | 2.13             | 154.3               | 161.9               |
| 15 | A0174-ASN                     | ND2              | D0173-ASN                        | OD1              | 3.13            | SS                         | -          | 8.77               | 150.1            | 2.22             | 120.7               | 119.4               |
| 16 | B0174-ASN                     | ND2              | A0174-ASN                        | OD1              | 2.98            | SS                         | -          | 4.90               | 161.9            | 2.01             | 162.2               | 168.1               |
| 17 | A0175-PHE                     | N                | B0174-ASN                        | O                | 2.93            | MM                         | -          | 6.16               | 158.8            | 2.11             | 158.6               | 164.7               |
| 18 | B0176-VAL                     | N                | A0175-PHE                        | O                | 2.87            | MM                         | -          | 6.08               | 170.4            | 2.02             | 174.9               | 177.7               |
| 19 | C0169-TYR                     | O4               | B0171-ASN                        | O                | 2.95            | SM                         | -          | 9.90               | 142.5            | 2.23             | 119.8               | 128.8               |
| 20 | A0171-ASN                     | N                | A0171-ASN                        | O                | 2.80            | MM                         | 0          | 0                  | 103.8            | 2.50             | 76.9                | 59.7                |
| 21 | A0172-GLN                     | N                | A0172-GLN                        | O                | 2.80            | MM                         | 0          | 0                  | 107.2            | 2.42             | 77.2                | 60.6                |
| 22 | A0173-ASN                     | N                | A0173-ASN                        | O                | 2.81            | MM                         | 0          | 0                  | 103.3            | 2.48             | 78.6                | 61.3                |

<sup>a</sup> Donor and acceptor names are abbreviated as the chain name followed by a four-digit residue number, a dash and the residue three letter code. A four-chain assembly (A-D) was used that encompass all unique hydrogen bonds in proto-PrP<sup>Sc</sup>; two sheets, with two strands each. Chains A and B make up one sheet, C and D make up the mating sheet.

<sup>b</sup> M represents main chain, S represents side chain.

All distances are measured in ångstroms; angles in degrees.

**Supplementary Table 3.** Crystallographic structure determination of carbamazepine.

| Carbamazepine                      | MicroED                 |
|------------------------------------|-------------------------|
| <b>Data collection</b>             |                         |
| Space group                        | P 1 21/m 1              |
| Cell dimensions                    |                         |
| <i>a</i> , <i>b</i> , <i>c</i> (Å) | 7.50, 11.00, 13.70      |
| <i>α</i> , <i>β</i> , <i>γ</i> (°) | 90.0, 93.2, 90.0        |
| Resolution (Å)                     | 7.49-0.849 (0.95-0.849) |
| <i>R</i> <sub>merge</sub>          | 0.084 (0.149)           |
| <i>R</i> <sub>meas</sub>           | 0.104 (0.182)           |
| <i>R</i> <sub>pim</sub>            | 0.059 (0.103)           |
| <i>I</i> / <i>σ</i> ( <i>I</i> )   | 8.19 (4.55)             |
| <i>CC</i> <sub>1/2</sub>           | 0.992 (0.961)           |
| Completeness (%)                   | 49.8 (23.3)             |
| No. Reflections                    | 2739 (371)              |
| Redundancy                         | 2.71 (2.01)             |
| <b>Refinement</b>                  |                         |
| No. reflections                    | 2739 (371)              |
| <i>R</i> <sub>work</sub>           | 0.20                    |
| <i>R</i> <sub>free</sub>           | 0.46                    |
| No. atoms                          |                         |
| Total                              | 30                      |
| Waters                             | 0                       |
| Hydrogens Possible                 | 12                      |
| Hydrogens Modeled                  | 12                      |

<sup>a</sup> Values in parentheses are for the highest-resolution shell.

**Supplementary Table 4.** Refinement of proto-PrP<sup>Sc</sup> as a function of resolution.

| proto-PrP <sup>Sc</sup>            | MicroED 0.75Å          | MicroED 0.80Å          | MicroED 0.90Å          | MicroED 1.00Å        | MicroED 1.10Å          |
|------------------------------------|------------------------|------------------------|------------------------|----------------------|------------------------|
| <b>Data collection</b>             |                        |                        |                        |                      |                        |
| Space group                        | P1                     | P1                     | P1                     | P1                   | P1                     |
| Cell dimensions                    |                        |                        |                        |                      |                        |
| <i>a</i> , <i>b</i> , <i>c</i> (Å) | 4.94 10.34 31.15       | 4.94 10.34 31.15       | 4.94 10.34 31.15       | 4.94 10.34 31.15     | 4.94 10.34 31.15       |
| <i>α</i> , <i>β</i> , <i>γ</i> (°) | 94.21 92.38            | 94.26 92.38            | 94.26 92.38            | 94.26 92.38          | 94.26 92.38            |
|                                    | 102.20                 | 102.20                 | 102.20                 | 102.20               | 102.20                 |
| Resolution (Å) <sup>a</sup>        | 10.34-0.75 (0.78-0.75) | 10.34-0.80 (0.83-0.80) | 10.34-0.90 (0.93-0.90) | 10.34-1.0 (1.04-1.0) | 10.34-1.10 (1.14-1.10) |
| <i>R</i> <sub>merge</sub>          | 0.232 (0.638)          | 0.227 (0.524)          | 0.221 (0.373)          | 0.217 (0.335)        | 0.214 (0.265)          |
| <i>R</i> <sub>meas</sub>           | 0.250 (0.729)          | 0.245 (0.585)          | 0.238 (0.409)          | 0.233 (0.364)        | 0.229 (0.285)          |
| <i>R</i> <sub>pim</sub>            | 0.090 (0.319)          | 0.0872 (0.247)         | 0.0839 (0.159)         | 0.0823 (0.139)       | 0.0801 (0.0992)        |
| <i>I</i> / <i>σ</i> ( <i>I</i> )   | 4.57 (1.77)            | 5.05 (2.52)            | 5.82 (3.64)            | 6.30 (4.24)          | 6.71 (5.65)            |
| <i>CC</i> <sub>1/2</sub>           | 0.982 (0.209)          | 0.981 (0.549)          | 0.981 (0.847)          | 0.98 (0.92)          | 0.979 (0.938)          |
| Completeness (%)                   | 96.95 (96.17)          | 97.36 (95.54)          | 97.74 (95.48)          | 98.08 (97.40)        | 97.84 (99.24)          |
| No. Reflections                    | 43252 (2359)           | 36981 (3191)           | 27687 (2542)           | 20376 (1848)         | 15910 (1780)           |
| Redundancy                         | 5.8 (4.4)              | 6.0 (5.1)              | 6.3 (5.8)              | 6.4 (5.9)            | 6.6 (6.8)              |
| <b>Ab initio phasing</b>           |                        |                        |                        |                      |                        |
| Atoms Placed <sup>b</sup>          | 62.4 ± 0.70            | 67.9 ± 1.37            | 66.5 ± 0.97            | 66.8 ± 0.42          | 66.9 ± 1.52            |
| CFOM                               | 97.0 ± 0.41            | 98.9 ± 0.41            | 102.0 ± 0.36           | 106.1 ± 0.56         | 99.0 ± 0.89            |
| <b>Refinement</b>                  |                        |                        |                        |                      |                        |
| No. reflections                    | 7473 (720)             | 6160 (623)             | 4377 (443)             | 3166 (314)           | 2408 (258)             |
| <i>R</i> <sub>work</sub>           | 0.243 (0.36)           | 0.233 (0.35)           | 0.218 (0.29)           | 0.205 (0.24)         | 0.197 (0.23)           |
| <i>R</i> <sub>free</sub>           | 0.252 (0.39)           | 0.247 (0.38)           | 0.222 (0.31)           | 0.217 (0.26)         | 0.215 (0.26)           |
| No. atoms                          |                        |                        |                        |                      |                        |
| Total                              | 152                    | 152                    | 152                    | 152                  | 152                    |
| Hydrogens Possible                 | 69                     | 69                     | 69                     | 69                   | 69                     |
| Hydrogens Modeled <sup>c</sup>     | 51                     | 40                     | 40                     | 38                   | 33                     |
| <i>B</i> factors                   |                        |                        |                        |                      |                        |
| Protein                            | 6.00                   | 6.51                   | 6.01                   | 5.79                 | 5.45                   |
| Water                              | 11.59                  | 16.24                  | 15.12                  | 13.30                | 13.25                  |
| R.m.s. deviations                  |                        |                        |                        |                      |                        |
| Bond lengths (Å)                   | 0.014                  | 0.013                  | 0.013                  | 0.012                | 0.012                  |
| Bond angles (°)                    | 1.01                   | 1.00                   | 1.06                   | 1.06                 | 1.08                   |

<sup>a</sup> Values in parentheses are for the highest resolution shell<sup>b</sup> Average number of atoms placed by ten independent runs of 10,000 placement tries in SHELX.<sup>c</sup> Hydrogens modeled include only those for which density is observed in 2Fo-Fc maps at 0.70σ or higher.
